# Supplementary material
Source: publisher site journal article supplement (https://www.dovepress.com/article/121263)
Supplement: Supplementary file 1 [file get_supplementary_file.php]

e-Appendix 1: keywords databases search:

- #1 Lung Diseases, Obstructive/
- #2 exp Pulmonary Disease, Chronic Obstructive/
- #3 (chronic\$ adj3 bronchiti\$).mp
- #4 (obstruct\$ adj3 (pulmonary or lung\$ or airway\$ or airflow\$ or bronch\$ or respirat\$)).mp
- #5 COPD.mp
- #6 COAD.mp
- #7 COBD.mp
- #8 Exp. Chronic, Bronchitis
- #9 Exp. Lung Diseases, Obstructive
- #10 #1 or #2 or #3 or #4 or #5 or #6 or #7 or #8 or #9
- #11 Exp. intervention studies/
- #12 Exp. Therapeutic/
- #13 Treat\*.mp.
- #14 Therap\*.mp.
- #15 Habilitation.mp.
- #16 Treatment\$
- #17 Intervention\$
- #18 Therapeutic\$
- #19 Manag\*.mp.
- #20 #11 or #12 or #13 or #14 or #15 or #16 or #17 or #18 or #19
- #21 Exp. "physical activity"
- #22 Exp. "Motor Activit\*"
- #23 Exp. "Locomotor Activit\*"
- #24 Activit\*.mp.
- #25 Exp. Physical Endurance\$
- #26 Train\*.mp.
- #27 #21 or #22 or #23 or #24 or #25 or #26
- #28 "Qualit\* of life"
- #29 (Qualit\* adj2 life)
- #30 "Activit\* of daily living"
- #31 (Activit\* adj3 living)
- #32 ADL.mp.
- #33 #28 or #29 or 30 or 31 or 32 or 33
- #34 #10 and #20 and #27 and #33

e-Appendix 2: data extraction form:

|              |      |       |                    |
|--------------|------|-------|--------------------|
| First author | Year | Title | Publication source |
|              |      |       |                    |

Study eligibility

|                    |                       |                        |                    |
|--------------------|-----------------------|------------------------|--------------------|
| Relevant studies   | Relevant participants | Relevant interventions | Relevant outcomes  |
| Yes - no - unclear | Yes - no - unclear    | Yes - no - unclear     | Yes - no - unclear |

Participants characteristics

|                                                                 |         |
|-----------------------------------------------------------------|---------|
| Number of participants enrolled                                 |         |
| Number of participants followed-up                              |         |
| Number of participants diagnosed with COPD                      |         |
| Number of participants diagnosed with other respiratory disease |         |
| Age (range or average) in years                                 |         |
| Participants gender                                             | Male:   |
|                                                                 | Female: |

trial characteristics

|                                      |                      |                   |
|--------------------------------------|----------------------|-------------------|
| Randomized control trials in title   | Concealed allocation | Blinding assessor |
| Yes – no                             | Yes – no             | Yes – no          |
| Describe the method of randomization |                      |                   |
|                                      |                      |                   |

Outcome measurement characteristics

|                                                                      |          |
|----------------------------------------------------------------------|----------|
| Primary outcome measurements                                         |          |
| Participation in physical activity                                   | Yes – no |
| Objective assessment                                                 | Yes – no |
| Subjective assessment (self-reported quality of life questionnaires) | Yes – no |
| Secondary outcome measurements                                       |          |
| Exercise capacity                                                    | Yes – no |
| Adverse outcomes                                                     | Yes – no |
| Pulmonary function test                                              |          |
| FEV <sub>1</sub>                                                     | Yes – no |
| FVC                                                                  | Yes – no |
| Quality of life assessment                                           | Yes – no |
| Dyspnea                                                              | Yes – no |

|                                           |
|-------------------------------------------|
| Other relevant information in the results |
|                                           |

|                                                             |
|-------------------------------------------------------------|
| Additional outcomes published in paper but not listed above |
|                                                             |

|                          |
|--------------------------|
| Main conclusion of trial |
|                          |

References to trial

Check other references identified in searches. If there are further references to this trial link the papers now & list below.

|                 |           |                                    |      |
|-----------------|-----------|------------------------------------|------|
| Code each paper | Author(s) | Journal/conference proceedings etc | Year |
| A (this paper)  |           |                                    |      |
| B (others)      |           |                                    |      |

e-Appendix 3: primary outcomes:

Online Table S1: studies comparing physical activity interventions versus usual care (or placebo).

| Study                   | Intervention                            | Control | Outcome (Unit)                                        | Time Point        | Intervention arm |              | Control arm |              | Effect Size [95% Confidence Interval] |
|-------------------------|-----------------------------------------|---------|-------------------------------------------------------|-------------------|------------------|--------------|-------------|--------------|---------------------------------------|
|                         |                                         |         |                                                       |                   | n                | Mean (SD)    | n           | Mean (SD)    |                                       |
| Berry 2003              | Maintenance ET                          | UC      | PASE activity score                                   | 15M               | 62               | 115.8 (61.9) | 56          | 111.6 (63.6) | 0.07 [-0.29-0.43]                     |
| Borges 2014             | Whole-body ET (average of 5.6 sessions) | UC      | Daily walking (min)                                   | 1M post-discharge | 15               | 30.9 (21)    | 14          | 49.7 (35)    | -0.64 [-1.39-0.11]                    |
|                         |                                         |         | Daily standing (min)                                  | 1M post-discharge | 15               | 167.8 (104)  | 14          | 153 (94)     | 0.14 [-0.58-0.87]                     |
|                         |                                         |         | Daily sitting (min)                                   | 1M post-discharge | 15               | 286.7 (122)  | 14          | 298 (107)    | -0.09 [-0.82-0.63]                    |
|                         |                                         |         | Daily lying (min)                                     | 1M post-discharge | 15               | 223.8 (131)  | 14          | 203.2 (140)  | 0.00 [-0.72-0.73]                     |
| Breyer 2010             | Nordic walking                          | UC      | $\Delta$ daily movement intensity (m/s <sup>2</sup> ) | 3M                | 30               | 1.98 (0.62)  | 30          | 1.47 (0.27)  | 1.05 [0.51-1.59]                      |
|                         |                                         |         |                                                       | 6M                | 30               | 1.85 (0.55)  | 30          | 1.50 (0.43)  | 0.70 [0.18-1.22]                      |
|                         |                                         |         |                                                       | 9M                | 30               | 1.81 (0.48)  | 30          | 1.39 (0.32)  | 1.02 [0.48-1.56]                      |
| Dal Negro 2010 and 2012 | EAAs                                    | Placebo | Daily steps (n)                                       | $\Delta$ 1M       |                  | 880 (837)    |             | 651.8 (558)  | NS                                    |
|                         |                                         |         |                                                       | $\Delta$ 3M       |                  | 1140 (525)   |             | 562.8 (602)  | p=0.02                                |
|                         |                                         |         | Daily energy expenditure (Kcal /step/FFM*Kg)          | 1M                |                  | 1.9 (0.85)   |             | 1.26 (0.7)   | P<0.03                                |
|                         |                                         |         |                                                       | 3M                |                  | 3.2 (1.7)    |             | 0.9 (0.5)    | p<0.005                               |
| Faulkner 2010           | Supervised ET                           | UC      | 7 days PA recall questionnaire score (Kcal)           | 9W                | 6                | 14311 (793)  | 8           | 14170 (728)  | 0.17 [-0.89-1.24]                     |
| Goris 2003              | Respifor®                               | UC      | Daily PA levels (arbitrary units)                     | 1M post discharge | 11               | 1.58 (0.07)  | 9           | 1.56 (0.07)  | 0.27 [-0.61- 1.16]                    |
|                         |                                         |         |                                                       | 3M post discharge | 11               | 1.60 (0.29)  | 9           | 1.54 (0.08)  | 0.25 [-0.66- 1.17]                    |
|                         |                                         |         | Daily energy expenditure (megajoule)                  | 1M post discharge | 11               | 8.8 (1.6)    | 9           | 9.4 (1.9)    | -0.33 [-1.22-0.56]                    |
|                         |                                         |         |                                                       | 3M post discharge | 11               | 9.0 (2.5)    | 9           | 8.5 (1.7)    | 0.22 [-0.70- 1.13]                    |

|                            |                               |                  |                                           |      |     |                 |     |                  |                    |
|----------------------------|-------------------------------|------------------|-------------------------------------------|------|-----|-----------------|-----|------------------|--------------------|
| Hornikx 2015               | PA counselling                | UC               | Daily steps (n)                           | Δ1M  | 15  | 984 (1208)      | 15  | 1013 (1275)      | -0.02 [-0.74-0.69] |
|                            |                               |                  | Daily walking (min)                       | Δ1M  | 15  | 13 (16)         | 15  | 13 (14)          | 0.00 [-0.72-0.72]  |
|                            |                               |                  | Daily movement intensity m/s <sup>2</sup> | Δ1M  | 15  | 0.08 (0.06)     | 15  | 0.06 (0.05)      | 0.5 [-0.37-1.07]   |
| Hospes 2009                | Exercise counselling          | UC               | Daily steps (n)                           | 12W  | 18  | 7872 (3962)     | 17  | 6172 (3194)      | 0.46 [-0.21- 1.13] |
| Jonsdottir 2015            | Self-management               | UC               | IPAQ total (MET-min/W)                    | 12M  | 43  | 6.72 (2.43)     | 46  | 6.00 (2.35)      | 0.30 [-0.12-0.72]  |
|                            |                               |                  | IPAQ vigorous (MET-min/W)                 | 12M  | 47  | 4.00 (3.58)     | 51  | 2.71 (3.25)      | 0.38 [-0.02-0.78]  |
|                            |                               |                  | IPAQ moderate (MET-min/W)                 | 12M  | 47  | 5.3 (2.88)      | 52  | 4.17 (3.09)      | 0.37 [-0.02-0.77]  |
|                            |                               |                  | IPAQ walking (MET-min/W)                  | 12M  | 47  | 3.87 (2.89)     | 52  | 3.62 (2.88)      | 0.09 [-0.31-0.48]  |
| Kruis 2014 (clustered RCT) | Integrated disease management | UC               | IPAQ total (MET min/day)                  | Δ12M | 554 | -44 (5175)      | 532 | -438 (5278)      | 0.08 [-0.04-0.20]  |
|                            |                               |                  | IPAQ high/moderate (%)                    | Δ12M | 554 | 32.2            | 532 | 22.1             | P<0.001            |
| Larson 2014                | Self-efficacy                 | UC               | Daily MVPA (min)                          | 4M   | 15  | 6 (6)           | 14  | 3 (2)            | 0.64 [-0.11-1.39]  |
|                            |                               |                  | Daily LPA (min)                           | 4M   | 15  | 256 (83)        | 14  | 196 (66)         | 0.77 [0.02-1.53]   |
|                            |                               |                  | Daily sedentary (min)                     | 4M   | 15  | 602 (112)       | 14  | 634 (114)        | -0.28 [-1.01-0.46] |
| Sandland 2008              | Cylinder O <sub>2</sub>       | Cylinder placebo | Daily activity counts                     | 8W   | 10  | 6912.1 (4171.2) | 10  | 5999.6 (3.807.9) | 0.30 [-0.59-1.18]  |
| Schüz 2015                 | Health monitoring             | UC               | Daily steps (n)                           | 6M   | 55  | 5360.45 (2963)  | 83  | 4547.7 (2485)    | 0.30 [-0.04-0.59]  |
|                            |                               |                  |                                           | 12M  | 73  | 4770.2 (2975.5) | 47  | 4708.7 (2389.4)  | 0.02 [-0.34-0.39]  |
| Steele 2008                | Exercise adherence after PR   | UC after PR      | Daily PA activity (VMU)                   | Δ20W | 42  | 18 (55)         | 47  | -2 (66)          | 0.32 [-0.09-0.74]  |
|                            |                               |                  |                                           | Δ12M | 31  | 6 (75)          | 39  | -11 (62)         | 0.25 [-0.23-0.72]  |
|                            |                               |                  | SR daily exercise (min)                   | Δ20W | 42  | 3 (39)          | 47  | -13 (26)         | 0.48 [0.06-0.91]   |
|                            |                               |                  |                                           | Δ12M | 31  | 1 (45)          | 39  | -8 (31)          | 0.24 [-0.24-0.71]  |
| Watz 2014 (crossover RCT)  | Indacaterol 150µg             | Placebo          | Daily steps (n)                           | 3W   | 83  | 7341 (2312.5)   | 83  | 6618 (2119.5)    | 0.32 [0.02-0.63]   |
|                            |                               |                  | Daily MVPA (min)                          | 3W   | 83  | 125 (90.6)      | 83  | 97 (83.7)        | 0.32 [0.01-0.63]   |
|                            |                               |                  | Daily PA (total EE/ resting EE)           | 3W   | 83  | 1.61 (0.23)     | 83  | 1.54 (0.21)      | 0.36 [0.05-0.67]   |
| Wilson 2015                | PR Maintenance                | UC               | IPAQ total (MET-min/W)                    | Δ12M | 16  | 134.38 (518.16) | 17  | -88.82 (407.53)  | 0.47 [-0.22-1.16]  |

|  |  |  |     |              |    |                  |    |                  |                  |
|--|--|--|-----|--------------|----|------------------|----|------------------|------------------|
|  |  |  | VAS | $\Delta$ 12M | 17 | 11.35<br>(18.92) | 18 | -4.88<br>(14.25) | 0.95 [0.25-1.65] |
|--|--|--|-----|--------------|----|------------------|----|------------------|------------------|

ET: Exercise Training, UC: Usual Care, EAA: Essential Amino Acids, PR: Pulmonary Rehabilitation, M: Month/s, W: Week/s,  $\Delta$ : Change from Baseline, PA: Physical Activity, IPAQ: International Physical Activity Questionnaire, EE: Energy Expenditure, METs: Metabolic Equivalent Task, SR: Self-Reported, VAS: Visual Activity Scale, VMU: Vector Magnitude Units.

Online Table S2: studies comparing physical activity interventions added to PR versus PR alone.

| Study Name     | Intervention                           | Control | Outcome (Unit)                                    | Time Point | Intervention arm |                 | Control arm |                 | Effect Size [95% Confidence Interval] |
|----------------|----------------------------------------|---------|---------------------------------------------------|------------|------------------|-----------------|-------------|-----------------|---------------------------------------|
|                |                                        |         |                                                   |            | n                | Mean (SD)       | n           | Mean (SD)       |                                       |
| Altenburg 2014 | PA counselling + PR                    | PR      | Daily steps (n)                                   | Δ3M        | 22               | 547 (841.5)     | 15          | -211 (1759.3)   | 0.58 [-0.10-1.25]                     |
|                |                                        |         |                                                   | Δ15M       | 10               | -569 (3009.6)   | 13          | -1137 (2817)    | 0.19 [-0.64-1.02]                     |
|                |                                        |         | Daily steps equivalent (energy cost in steps) (n) | Δ3M        | 22               | 1302 (1552)     | 15          | -849 (2358.5)   | 1.10 [0.39-1.81]                      |
|                |                                        |         |                                                   | Δ15M       | 10               | -213 (5036.3)   | 13          | -1827 (3088)    | 0.39 [-0.42-1.20]                     |
| Burtin 2015    | PA counselling + PR                    | PR      | Daily steps (n)                                   | Δ3M        | 30               | 576 (2649.4)    | 31          | 394 (845)       | 0.09 [-0.41-0.59]                     |
|                |                                        |         |                                                   | Δ6M        | 28               | -78 (2741)      | 22          | 454 (662.2)     | -0.25 [-0.81-0.31]                    |
|                |                                        |         | Daily walking time (min)                          | Δ3M        | 30               | -0.6 (23.9)     | 31          | 2 (12.1)        | -0.14 [-0.64-0.37]                    |
|                |                                        |         |                                                   | Δ6M        | 28               | 2 (8.8)         | 22          | 3 (40.4)        | -0.04 [-0.59-0.52]                    |
|                |                                        |         | Daily MVPA (>3.6 METs)                            | Δ3M        | 30               | 1.4 (27.6)      | 31          | 2 (23.5)        | -0.02 [-0.53-0.48]                    |
|                |                                        |         |                                                   | Δ6M        | 28               | -6.5 (23.9)     | 22          | 0 (11.1)        | -0.33 [-0.89-0.23]                    |
|                |                                        |         | Daily MVPA (>2.0 METs)                            | Δ3M        | 30               | 0 (70.5)        | 31          | 12 (25)         | -0.23 [-0.73-0.28]                    |
|                |                                        |         |                                                   | Δ6M        | 28               | -23 (28.6)      | 22          | 11 (23.2)       | -1.27 [-1.88—0.65]                    |
| Cruz 2016      | PA focused behavioral counselling + PR | PR      | Daily steps (n)                                   | 3M         | 13               | 10440 (4012.9)  | 13          | 6430 (2613.1)   | 1.15 [0.31-1.99]                      |
|                |                                        |         |                                                   | 6M         | 13               | 9747.9 (3511.8) | 13          | 6481.3 (3454.4) | 0.90 [0.08-1.71]                      |
|                |                                        |         | Daily overall MVPA (>3.0 METs) (min)              | 3M         | 13               | 57.8 (32.8)     | 13          | 26.7 (19.6)     | 1.11 [0.28-1.95]                      |
|                |                                        |         |                                                   | 6M         | 13               | 51.6 (29.4)     | 13          | 28.0 (26.0)     | 0.82 [0.02-1.63]                      |
|                |                                        |         | Daily PA (≥ 1.5 METs) (min)                       | 3M         | 13               | 279.5 (74.0)    | 13          | 212.0 (53.9)    | 1.01 [0.19-1.83]                      |
|                |                                        |         |                                                   | 6M         | 13               | 269.3 (61.5)    | 13          | 202.9 (82.5)    | 0.88 [0.07-1.70]                      |
|                |                                        |         | Daily MVPA bouts* (>3.0 METs, ≥ 30min) (min)      | 3M         | 13               | 23.3 (28.6)     | 13          | 4.3 (7.3)       | 0.88 [0.07-1.69]                      |
|                |                                        |         |                                                   | 6M         | 13               | 20.3 (24.2)     | 13          | 3.8 (7.4)       | 0.89 [0.08-1.71]                      |

|                   |                                         |               |                                          |                 |    |               |    |               |                    |
|-------------------|-----------------------------------------|---------------|------------------------------------------|-----------------|----|---------------|----|---------------|--------------------|
|                   |                                         |               | Daily sedentary ( $\leq 1.5$ METs) (min) | 3M              | 13 | 536.4 (86.6)  | 13 | 625.9 (93.3)  | 0.96 [0.14-1.78]   |
|                   |                                         |               |                                          | 6M              | 13 | 578.8 (102.8) | 13 | 566.8 (116.5) | -0.11 [-0.88-0.66] |
| de Blok 2006      | Lifestyle PA counselling + PR           | PR            | Daily steps (n)                          | 9W              | 8  | 3512 (2474.9) | 8  | 2832 (1878.2) | 0.29 [-0.69-1.28]  |
| Duiverman 2008    | NIPPV + PR                              | PR            | Daily steps (n)                          | $\Delta 3M$     | 31 | 906 (1062.2)  | 35 | 413 (1062.2)  | 0.46 [-0.03-0.95]  |
| Kawagoshi 2015    | Pedometer feedback during home-based PR | Home-based PR | Daily walking (min)                      | $\Delta 12M$    | 12 | 51.3 (63.7)   | 15 | 12.3 (25.5)   | 0.82 [0.02-1.61]   |
|                   |                                         |               | Daily standing (min)                     | $\Delta 12M$    | 12 | 43.0 (28.1)   | 15 | 31.3 (46.8)   | 0.29 [-0.48-1.05]  |
|                   |                                         |               | Daily sitting (min)                      | $\Delta 12M$    | 12 | 59.3 (103.3)  | 15 | 6.1 (90.1)    | -0.54 [-1.13-0.24] |
|                   |                                         |               | Daily lying down time (min)              | $\Delta 12M$    | 12 | -52.9 (68.4)  | 15 | -28.6 (55.1)  | 0.38 [-0.38-1.15]  |
| Kesten 2008       | Tiotropium + PR                         | Placebo + PR  | Activity time questionnaire (min in 2W)  | $\Delta W4-W13$ | 22 | 145 (294)     | 16 | 66 (384)      | 0.23 [-0.42-0.88]  |
|                   |                                         |               |                                          | $\Delta W4-W17$ | 22 | 269 (295)     | 16 | 99 (424)      | 0.47 [-0.18-1.12]  |
|                   |                                         |               |                                          | $\Delta W4-W21$ | 19 | 159 (252.8)   | 17 | 125 (445.3)   | 0.09 [-0.56-0.75]  |
|                   |                                         |               |                                          | $\Delta W4-W25$ | 22 | 262 (450.3)   | 16 | 60 (372)      | 0.47 [-0.18-1.13]  |
| Pleguezuelos 2013 | Urban walking circuits + PR             | PR            | Daily walking (min)                      | 12M             | 34 | 81.62 (31)    | 37 | 49.05 (14)    | 1.36 [0.84-1.88]   |
|                   |                                         |               | Weekly days walked (n)                   | 12M             | 34 | 4.44 (0.9)    | 37 | 3.43 (1.2)    | 0.90 [0.41-1.39]   |

\*Continuous bouts of 30 minutes or more or in bouts of 10 minutes or more, ET: Exercise Training, PR: Pulmonary Rehabilitation, M: Month/s, W: Week/s,  $\Delta$ : Change from Baseline, PA: Physical Activity, MVPA: Moderate to Vigorous Physical Activity, EE: Energy Expenditure, METs: Metabolic Equivalent Task. NIPPV: Non-Invasive Positive Pressure Ventilation.

Online Table S3: studies comparing physical activity interventions versus another physical activity intervention.

| Study         | Intervention                                     | Control                                     | Outcome (Unit)                                | Time Point | Intervention arm |                | Control arm |                 | Effect Size [95% Confidence Interval] |
|---------------|--------------------------------------------------|---------------------------------------------|-----------------------------------------------|------------|------------------|----------------|-------------|-----------------|---------------------------------------|
|               |                                                  |                                             |                                               |            | n                | Mean (SD)      | n           | Mean (SD)       |                                       |
| Berry 2010    | Lifestyle activity program                       | ET                                          | CHAMPS-MVPA (Kcals/W)                         | 3M         | 41               | 2497 (1366)    | 55          | 2497 (1418)     | 0.00 [-0.40-0.40]                     |
|               |                                                  |                                             |                                               | 6M         | 41               | 2462 (1242)    | 53          | 2213 (1371)     | 0.19 [-0.22-0.60]                     |
|               |                                                  |                                             |                                               | 12M        | 37               | 2348 (1399)    | 49          | 2217 (1552)     | 0.09 [-0.34-0.51]                     |
| Casaburi 2012 | Lightweight ambulatory O2                        | E-Cylinder ambulatory O2                    | Mid-day PA from 10:00 am to 4:00 pm (VMU/min) | 3M         | 11               | 133.6 (75.3)   | 11          | 81.4 (36)       | 0.85 [-0.03-1.73]                     |
|               |                                                  |                                             |                                               | 6M         | 11               | 124.2 (73.8)   | 11          | 90.4 (45.1)     | 0.53 [-0.32-1.39]                     |
| Effing 2011   | ET + Self-management                             | Self-management                             | Daily steps (n)                               | Δ7M        | 59               | 478.1 (2676.9) | 52          | -87.3 (2261.4)  | 0.23 [-0.15-0.60]                     |
|               |                                                  |                                             |                                               | Δ12M       | 55               | 815.6 (2659.4) | 55          | -374.8 (2272.3) | 0.48 [0.10-0.86]                      |
| Mendoza 2015  | Pedometer-based counselling                      | Standard counselling                        | Daily steps (n)                               | Δ3M        | 50               | 3080 (3254.8)  | 47          | 138.3 (1950.4)  | 1.08 [0.65-1.51]                      |
| Moy 2015      | Internet-mediated pedometer-based program        | Pedometer recording only                    | Daily steps (n)                               | Δ4M        | 133              | 447 (1817)     | 68          | -346 (1949)     | 0.84 [0.59-1.08]                      |
| Nguyen 2009   | Cell phone-mediated exercise persistence program | Cell phone-mediated self-monitoring program | Daily steps (n)                               | 3M         | 9                | 5879 (3048)    | 8           | 4452 (3060.4)   | 0.44 [-0.52-1.14]                     |
|               |                                                  |                                             |                                               | 6M         | 9                | 5675 (3021)    | 8           | 5383 (3023.5)   | 0.09 [-1.86-1.04]                     |
|               |                                                  |                                             | Daily % of sedentary time (0 steps/hour)      | 3M         | 9                | 70 (12.3)      | 8           | 73.8 (12.1)     | 0.30 [-0.66-1.25]                     |
|               |                                                  |                                             |                                               | 6M         | 9                | 69.5 (12.3)    | 8           | 69.3 (12.3)     | -0.02 [-0.97-0.94]                    |
|               |                                                  |                                             | Daily % of MVPA time (≥31 steps/min)          | 3M         | 9                | 24.2 (7.8)     | 8           | 18.6 (7.9)      | 0.68 [-0.31-1.66]                     |
|               |                                                  |                                             |                                               | 6M         | 9                | 23.6 (7.8)     | 8           | 23.5 (8.2)      | 0.01 [-0.89-1.00]                     |
| Pomidori 2012 |                                                  | Home-based walking with                     | Daily METs (3.5ml/Kg.min)                     | 6M         | 18               | 1.31 (0.16)    | 18          | 1.36 (0.22)     | -0.25 [-0.19-0.40]                    |



|                |                                     |                                  |                                                 |      |    |                |    |               |                    |
|----------------|-------------------------------------|----------------------------------|-------------------------------------------------|------|----|----------------|----|---------------|--------------------|
|                | Home-based walking with fixed speed | fixed distance                   |                                                 | Δ12M | 18 | 0.17 (0.14)    | 18 | 0.04 (0.13)   | 0.94 [0.25-1.63]   |
|                |                                     |                                  | Daily METs peak (3.5ml/Kg.min)                  | 6M   | 18 | 1.46 (0.23)    | 18 | 1.48 (0.26)   | -0.08 [-0.73-0.57] |
|                |                                     |                                  |                                                 | Δ12M | 18 | 0.16 (0.20)    | 18 | 0.06 (0.13)   | 0.58 [-0.09-1.25]  |
|                |                                     |                                  | Total MVPA (>3METs) time in 7days (h)           | 6M   | 18 | 57 (51)        | 18 | 67 (46)       | -0.20 [-0.86-0.45] |
|                |                                     |                                  |                                                 | Δ12M | 18 | 35 (32)        | 18 | 13 (28)       | 0.72 [0.04-1.39]   |
| Probst 2011    | High intensity and whole-body ET    | Light intensity and breathing ET | Daily steps (n)                                 | 12W  | 20 | 4179 (646.7)   | 20 | 4278.6 (796)  | -0.13 [-0.76-0.49] |
|                |                                     |                                  | Daily walking (min)                             | 12W  | 20 | 52.7 (40.4)    | 20 | 43.5 (26.7)   | 0.26 [-0.36-0.89]  |
|                |                                     |                                  | Daily sitting (min)                             | 12W  | 20 | 313.6 (110)    | 20 | 330.5 (122.7) | -0.14 [-0.76-0.48] |
|                |                                     |                                  | Daily standing (min)                            | 12W  | 20 | 241.1 (114.1)  | 20 | 226.2 (127)   | 0.12 [-0.50-0.74]  |
|                |                                     |                                  | Daily lying (min)                               | 12W  | 20 | 93.4 (76.3)    | 20 | 112.7 (84.7)  | -0.23 [-0.86-0.39] |
|                |                                     |                                  | Daily activities cost >3METs (min)              | 12W  | 20 | 74 (18.7)      | 20 | 53.1 (16.4)   | 1.16 [0.49-1.84]   |
|                |                                     |                                  | Daily total EE (Kcal)                           | 12W  | 20 | 1312.3 (119.4) | 20 | 1347 (199)    | -0.21 [-0.83-0.41] |
|                |                                     |                                  | Daily activity cost>3METs EE (Kcal)             | 12W  | 20 | 408 (118.3)    | 20 | 343.8 (442.4) | 0.19 [-0.43-0.82]  |
| Sewell 2005    | Individualized ET                   | General ET                       | Daily activity counts (%)                       | Δ7W  | 64 | 40.6 (135.5)   | 59 | 29.2 (101.8)  | 0.09 [-0.26-0.45]  |
| Tabak 2014     | Internet-mediated PA counselling    | ET                               | Daily steps (n)                                 | 3W   | 14 | 5603 (3475.8)  | 16 | 4617 (3460)   | 0.28 [-0.46-1.01]  |
| Troosters 2014 | Tiotropium 18µg and PA counselling  | Placebo and PA counselling       | Daily steps (n)                                 | 24W  |    | 6481           |    | 6116          |                    |
|                |                                     |                                  | Daily age-appropriate MVPA (min)                | 24W  |    | 72.3           |    | 64.2          |                    |
|                |                                     |                                  | Light PA time (min)                             | 24W  |    | 111.4 (81.7)   |    | 101.4 (79.9)  |                    |
| Vergeret 1989  | LTOT with portable O2               | LTOT with fixed O2               | Questionnaire-daily indoors rest time (h)       | 12M  | 84 | 12.8           | 75 | 12.8          | NS                 |
|                |                                     |                                  | Questionnaire-daily indoors activities time (h) | 12M  | 84 | 9.3            | 75 | 9.3           | NS                 |

|  |  |  |                                                  |     |    |           |    |           |                    |
|--|--|--|--------------------------------------------------|-----|----|-----------|----|-----------|--------------------|
|  |  |  | Questionnaire-daily outdoors activities (h)      | 12M | 84 | 1.8       | 75 | 1.6       | NS                 |
|  |  |  | Questionnaire-daily outdoors distance walked (m) | 12M | 84 | 480 (397) | 75 | 520 (370) | -0.10 [-0.42-0.21] |

ET: Exercise Training, METs: Metabolic Equivalent Tasks, MVPA: Moderate to Vigorous Physical Activity, EE: Energy Expenditure, M: Month/s, W: Week/s, SR: Self-reported, EDU: Education, Δ: change from baseline. min: minutes, h: hours. LTOT: Long Term Oxygen Therapy, CHAMPS: Community Healthy Activities Model Program for Seniors.

e- Appendix 4: secondary outcomes

Online Table S4: physical activity interventions effect on exercise capacity.

| Study Name                                                                              | Intervention                            | Control          | Outcome (Unit) | Time Point          | Intervention |                  | Control |                  | Effect Size [95%CI] |
|-----------------------------------------------------------------------------------------|-----------------------------------------|------------------|----------------|---------------------|--------------|------------------|---------|------------------|---------------------|
|                                                                                         |                                         |                  |                |                     | n            | Mean (SD)        | n       | Mean (SD)        |                     |
| <b>Studies comparing physical activity interventions versus usual care (or placebo)</b> |                                         |                  |                |                     |              |                  |         |                  |                     |
| Berry 2003                                                                              | Maintenance ET                          | UC               | 6MWD (ft)      | 6M                  | 64           | 1830.6 (232.8)   | 52      | 1739.6 (112.3)   | 0.48 [0.11- 0.85]   |
|                                                                                         |                                         |                  |                | 12M                 | 60           | 1810.5 (228.7)   | 44      | 1708.6 (216.4)   | 0.45 [0.06- 0.85]   |
|                                                                                         |                                         |                  |                | 15M                 | 62           | 1815.0 (260.7)   | 56      | 1711.5 (270.7)   | 0.39 [0.02- 0.75]   |
| Borges 2014                                                                             | Whole-body ET (average of 5.6 sessions) | UC               | Δ6MWD (m)      | %Δdischarge         | 15           | 74.2 (118.9)     | 14      | 4.1 (7.48)       | 0.79 [0.03-1.56]    |
|                                                                                         |                                         |                  |                | %Δ1M post discharge | 15           | 87.8 (116.9)     | 14      | 29.4 (65.9)      | 0.59 [-0.15-1.34]   |
| Breyer 2010                                                                             | Nordic walking                          | UC               | 6MWD (m)       | 3M                  | 30           | 540 (159)        | 30      | 442 (133)        | 0.47 [-0.04- 0.98]  |
|                                                                                         |                                         |                  |                | 6M                  | 30           | 531 (142)        | 30      | 428 (138)        | 0.73 [0.20- 1.25]   |
|                                                                                         |                                         |                  |                | 9M                  | 30           | 519 (160)        | 30      | 422 (130)        | 0.66 [0.14- 1.18]   |
| Faulkner 2010                                                                           | Supervised ET                           | UC               | ISWD (m)       | 9W                  | 6            | 399 (172)        | 8       | 362 (125)        | 0.24 [-0.83- 1.30]  |
| Hornikx 2015                                                                            | PA counselling                          | UC               | 6MWD (m)       | Δ1M                 | 15           | 67 (84)          | 15      | 64 (59)          | 0.04 [-0.68-0.76]   |
| Hospes 2009                                                                             | Exercise counselling                    | UC               | 6MWD (m)       | 12W                 | 18           | 387.4 (46.6)     | 17      | 361.4 (66.6)     | 0.46 [-0.21- 1.13]  |
| Sandland 2008                                                                           | Cylinder O <sub>2</sub>                 | Cylinder placebo | ISWD (m)       | 8W                  | 10           | 251.1 (136.2)    | 10      | 211.1 (98.8)     | 0.32 [-0.56-1.21]   |
|                                                                                         |                                         |                  | ESWT (s)       | 8W                  | 10           | 340 (336.1)      | 10      | 170.3 (97.5)     | 0.66 [-0.25-1.56]   |
| Steele 2008                                                                             | Exercise adherence after PR             | UC after PR      | 6MWD (m)       | Δ20W                | 42           | -10.7 (63.1)     | 47      | -35.4 (49.1)     | 0.44 [0.01- 0.86]   |
|                                                                                         |                                         |                  |                | Δ12M                | 31           | -21(60.7)        | 39      | -39.6 (65.5)     | 0.29 [-0.18- 0.76]  |
| Wilson 2012                                                                             | PR Maintenance                          | UC               | ISWD (m)       | Δ12M                | 40           | -70.22 (487.59)  | 40      | -179.29 (451.37) | 0.23 [-0.21-0.67]   |
|                                                                                         |                                         |                  | ESWT (s)       | Δ12M                | 40           | -152.90 (430.32) | 43      | -142.84 (398.91) | -0.02 [-0.45-0.41]  |
| <b>Studies comparing physical activity interventions added to PR versus PR alone</b>    |                                         |                  |                |                     |              |                  |         |                  |                     |
| Altenburg 2014                                                                          | PA counselling (12W) + PR (9W)          | PR (9W)          | 6MWD (m)       | 3M                  | 22           | 419 (47)         | 15      | 379 (81)         | 0.62 [-0.05-1.30]   |
|                                                                                         |                                         |                  |                | 15M                 | 10           | 409 (164)        | 13      | 449 (85)         | -0.31 [-1.14-0.52]  |
| Burtin 2015                                                                             | PA counselling (6M) + PR (6M)           | PR (6M)          | 6MWD (m)       | Δ3M                 | 30           | 47 (78)          | 31      | 36 (51)          | 0.18 [-0.32-0.68]   |
|                                                                                         |                                         |                  |                | Δ6M                 | 28           | 43 (101)         | 22      | 36 (58)          | 0.08 [-0.48-0.64]   |
| Cruz 2016                                                                               | PA focused behavioral                   | PR (3M)          | 6MWD (m)       | 3M                  | 13           | 547.9 (47.9)     | 13      | 529.7 (57.2)     | 0.33 [-0.44-1.11]   |
|                                                                                         |                                         |                  |                | 6M                  | 13           | 540.4 (31.1)     | 13      | 519.4 (50.8)     | 0.48 [-0.30-1.26]   |

|                                                                                                        |                                                               |                                                           |                                             |      |    |               |    |               |                    |
|--------------------------------------------------------------------------------------------------------|---------------------------------------------------------------|-----------------------------------------------------------|---------------------------------------------|------|----|---------------|----|---------------|--------------------|
|                                                                                                        | counselling (6M)<br>+ PR (3M)                                 |                                                           |                                             |      |    |               |    |               |                    |
| Duiverman<br>2008                                                                                      | Non-invasive<br>positive pressure<br>ventilation during<br>PR | PR                                                        | 6MWD (m)                                    | 3M   | 31 | 340 (119)     | 35 | 325 (108)     | 0.13 [-0.35-0.61]  |
|                                                                                                        |                                                               |                                                           | ESWT (s)                                    | 3M   | 31 | 475 (529.6)   | 35 | 449 (614.1)   | 0.04 [-0.44-0.53]  |
| Kawagoshi<br>2015                                                                                      | Pedometer<br>feedback during<br>home-based PR                 | Home-<br>based PR                                         | 6MWD (m)                                    | 12M  | 12 | 445 (138)     | 15 | 467 (151)     | -0.15 [-0.91-0.61] |
| Kesten<br>2008                                                                                         | Tiotropium (25W)<br>+ PR (8W from<br>W4 to W13)               | Placebo<br>(25W) + PR<br>(8W from<br>W4 to W13)           | Treadmill<br>endurance<br>time (min)        | 13W  | 22 | 22.7 (11.6)   | 16 | 16.6 (11.2)   | 0.52 [-0.13-1.18]  |
|                                                                                                        |                                                               |                                                           |                                             | 25W  | 22 | 26.8 (14.5)   | 16 | 17 (14)       | 0.67 [0.01-1.33]   |
| Pleguezuelos<br>2013                                                                                   | Urban walking<br>circuits (9M) + PR<br>(3M)                   | PR (3M)                                                   | 6MWD (m)                                    | 12M  | 34 | 445.41 (60.9) | 37 | 406.6 (68.2)  | 0.59 [0.12- 1.07]  |
| <b>Studies comparing physical activity interventions versus another physical activity intervention</b> |                                                               |                                                           |                                             |      |    |               |    |               |                    |
| Berry 2010                                                                                             | Lifestyle activity<br>program                                 | ET                                                        | 6MWD (m)                                    | 3M   | 61 | 434.8 (68.7)  | 69 | 428.7 (69)    | 0.09 [-0.26-0.43]  |
|                                                                                                        |                                                               |                                                           |                                             | 6M   | 61 | 426.7 (77.3)  | 69 | 439.8 (82)    | -0.16 [-0.51-0.18] |
|                                                                                                        |                                                               |                                                           |                                             | 12M  | 61 | 408.1 (80.4)  | 69 | 430.5 (83)    | -0.27 [-0.62-0.07] |
| Effing 2011                                                                                            | ET and self-<br>management                                    | Self-<br>managem<br>ent                                   | ISWD (m)                                    | Δ7M  | 68 | 12.2 (87.4)   | 60 | -12.1 (65.1)  | 0.31 [-0.04-0.66]  |
|                                                                                                        |                                                               |                                                           |                                             | Δ12M | 69 | 11.1 (92.2)   | 66 | -24 (66.6)    | 0.43 [0.09-0.77]   |
|                                                                                                        |                                                               |                                                           | ESWD (m)                                    | Δ7M  | 68 | 106.1 (555.8) | 60 | -15.9 (430.7) | 0.24 [-0.11-0.59]  |
|                                                                                                        |                                                               |                                                           |                                             | Δ12M | 68 | 53.3 (555.8)  | 66 | -92.5 (442.7) | 0.29 [-0.05-0.63]  |
| Mendoza<br>2015                                                                                        | Pedometer-based<br>counselling                                | Standard<br>counselling                                   | 6MWD (m)                                    | Δ3M  | 50 | 12.4 (34.6)   | 47 | -0.7 (24.4)   | 0.43 [0.03-0.83]   |
| Nguyen<br>2009                                                                                         | Cell phone-<br>mediated exercise<br>persistence<br>program    | Cell phone-<br>mediated<br>self-<br>monitoring<br>program | 6MWD (ft)                                   | 3M   | 9  | 1206 (381)    | 8  | 1222 (379)    | -0.04 [-0.99-0.91] |
|                                                                                                        |                                                               |                                                           |                                             | 6M   | 9  | 1194 (275)    | 8  | 1268 (384.6)  | -0.21 [-1.17-0.74] |
|                                                                                                        |                                                               |                                                           | Incremental<br>cycle<br>endurance<br>(watt) | 6M   | 9  | 48.9 (23.7)   | 8  | 49.2 (27.2)   | -0.01 [-0.96-0.94] |
| Nguyen<br>2013                                                                                         | Internet-mediated<br>dyspnea self-<br>management<br>program   | General<br>EDU                                            | 6MWD (ft)                                   | 3M   | 43 | 1417 (347.9)  | 41 | 1373 (347.9)  | 0.13 [-0.30-0.55]  |
|                                                                                                        |                                                               |                                                           |                                             | 6M   | 43 | 1429 (374.7)  | 41 | 1314 (375.7)  | 0.30 [-0.13-0.73]  |
|                                                                                                        |                                                               |                                                           |                                             | 12M  | 43 | 1415 (408.2)  | 41 | 1334 (410)    | 0.20 [-0.23-0.63]  |

|                  |                                           |                                                     |                                 |              |    |               |    |               |                    |
|------------------|-------------------------------------------|-----------------------------------------------------|---------------------------------|--------------|----|---------------|----|---------------|--------------------|
| Pomidori<br>2012 | Home-based<br>walking with fixed<br>speed | Home-<br>based<br>walking<br>with fixed<br>distance | 6MWD (m)                        | $\Delta$ 12M | 18 | 73 (30)       | 18 | 54 (48)       | 0.46 [-0.20-1.13]  |
| Probst<br>2011   | High intensity and<br>whole-body ET       | Light<br>intensity<br>and<br>breathing<br>ET        | 6MWD (m)                        | 12W          | 20 | 483 (89)      | 20 | 424 (114)     | 0.57 [-0.07-1.20]  |
|                  |                                           |                                                     | Maximum<br>Work load<br>(Watts) | 12W          | 20 | 48 (30)       | 20 | 30 (30)       | 0.59 [-0.05-1.22]  |
|                  |                                           |                                                     | Endurance<br>Time (min)         | 12W          | 20 | 17 (23.6)     | 20 | 7.9 (7.1)     | 0.51 [-0.12-1.14]  |
| Sewell<br>2005   | Individualized ET                         | General ET                                          | ISWD (m)                        | $\Delta$ 7W  | 64 | 85.5 (73.1)   | 59 | 81.72 (73)    | 0.05 [-0.30- 0.41] |
|                  |                                           |                                                     | ESWT (s)                        | $\Delta$ 7W  | 64 | 435.4 (370.6) | 59 | 511.2 (367.6) | 0.72 [0.35-1.09]   |

ET: Exercise Training, UC: Usual Care, 6MWD: Six Minute Walk Distance, M: Month/s, W: Week/s, O<sub>2</sub>: Oxygen, ISWD: Incremental Shuttle Walk Distance, ESWT: Endurance Shuttle Walk Time, ISWD: Incremental Shuttle Walk Distance PR: Pulmonary Rehabilitation.

Online Table S5: Physical activity interventions effect on health-related quality of life (HRQL).

| Study Name                                                                              | Intervention                                | Control | Outcome (Unit)               | Time Point         | Intervention |              | Control |              | Effect Size [95%CI] |
|-----------------------------------------------------------------------------------------|---------------------------------------------|---------|------------------------------|--------------------|--------------|--------------|---------|--------------|---------------------|
|                                                                                         |                                             |         |                              |                    | n            | Mean (SD)    | n       | Mean (SD)    |                     |
| <b>Studies comparing physical activity interventions versus usual care (or placebo)</b> |                                             |         |                              |                    |              |              |         |              |                     |
| Borges 2014                                                                             | Whole-body training exercise (≥ 3 sessions) | UC      | SGRQ Total                   | Δ discharge        | 15           | -10.7 (11.8) | 14      | -2.4 (19.6)  | 0.50 [-1.24-0.24]   |
|                                                                                         |                                             |         |                              | Δ1M post discharge | 15           | -24.3 (21.5) | 14      | -18.8 (28.1) | 0.21 [-0.95-0.52]   |
| Breyer 2010                                                                             | Nordic walking                              | UC      | SF36 Physical                | 3M                 | 28           | 42.5 (9.62)  | 25      | 32.7 (6.36)  | 1.17 [0.58- 1.76]   |
|                                                                                         |                                             |         |                              | 6M                 | 28           | 44.1 (8.12)  | 25      | 30.8 (7.40)  | 1.68 [1.05- 2.32]   |
|                                                                                         |                                             |         |                              | 9M                 | 28           | 43.6 (9.52)  | 25      | 29.9 (6.89)  | 1.61 [0.98- 2.24]   |
|                                                                                         |                                             |         | SF36 Mental                  | 3M                 | 14           | 47.2 (10.7)  | 16      | 41.53 (12.8) | 0.46 [-0.26- 1.19]  |
|                                                                                         |                                             |         |                              | 6M                 | 14           | 47.4 (8.91)  | 16      | 40.7 (9.36)  | 0.71 [-0.03- 1.46]  |
|                                                                                         |                                             |         |                              | 9M                 | 14           | 46.3 (8.71)  | 16      | 38.7 (8.71)  | 0.85 [0.10- 1.60]   |
| Dal Negro 2010 and 2012                                                                 | EAs                                         | Placebo | SGRQ Total                   | 3M                 | 44           | 69.35 (9.51) | 44      | 72.79 (7.3)  | 0.4 [-0.01-0.84]    |
| Faulkner 2010                                                                           | Supervised ET                               | UC      | CRQ Total                    | 9W                 | 6            | 90.9 (16.4)  | 6       | 91.3 (20.0)  | -0.02 [-1.15- 1.11] |
| Hospes 2009                                                                             | Exercise counselling                        | UC      | SGRQ Total                   | 12W                | 18           | 34.2 (13.5)  | 17      | 38.3 (16.8)  | 0.26 [-0.04-0.93]   |
|                                                                                         |                                             |         | CCQ Total                    | 12W                | 18           | 1.5 (0.8)    | 17      | 1.9 (0.9)    | 0.46 [-0.21-1.13]   |
|                                                                                         |                                             |         | SF36 Physical functioning    | 12W                | 18           | 24.4 (3.5)   | 17      | 23.3 (4.7)   | 0.26 [-0.41- 0.93]  |
|                                                                                         |                                             |         | SF36 Vitality                | 12W                | 18           | 16.0 (2.2)   | 17      | 15.7 (4.5)   | 0.08 [-0.58- 0.75]  |
|                                                                                         |                                             |         | SF36 Bodily pain             | 12W                | 18           | 48.5 (14.5)  | 17      | 51.8 (11.9)  | -0.24 [-0.91- 0.42] |
|                                                                                         |                                             |         | SF36 General health          | 12W                | 18           | 13.8 (2.9)   | 17      | 12.9 (3.0)   | 0.30 [-0.37- 0.97]  |
|                                                                                         |                                             |         | SF36 Change in health status | 12W                | 18           | 2.7 (0.6)    | 17      | 2.6 (0.7)    | 0.15 [-0.36- 0.66]  |
|                                                                                         |                                             |         | SF36 Social functioning      | 12W                | 18           | 8.4 (1.8)    | 17      | 7.8 (1.9)    | 0.32 [-0.35- 0.98]  |

|                           |                               |                  |                           |      |     |               |     |               |                     |
|---------------------------|-------------------------------|------------------|---------------------------|------|-----|---------------|-----|---------------|---------------------|
|                           |                               |                  | SF36 Physical functioning | 12W  | 18  | 6.8 (1.4)     | 17  | 6.2 (1.8)     | 0.36 [-0.30- 1.03]  |
|                           |                               |                  | SF36 Emotional problems   | 12W  | 18  | 5.5 (0.9)     | 17  | 5.7 (0.9)     | -0.22 [-0.88- 0.45] |
|                           |                               |                  | SF36 Mental health        | 12W  | 18  | 24.6 (2.8)    | 17  | 24.7 (4.1)    | -0.03 [-0.69- 0.63] |
| Sandland 2008             | Cylinder O2                   | Cylinder placebo | CRQ Dyspnea               | 8W   | 10  | 2.2 (0.9)     | 10  | 2.5 (1.4)     | -0.24 [-1.12-0.64]  |
|                           |                               |                  | CRQ Emotional function    | 8W   | 10  | 4.8 (2)       | 10  | 3.8 (2.4)     | 0.43 [-0.46-1.32]   |
|                           |                               |                  | CRQ Mastery               | 8W   | 10  | 5.1 (2.2)     | 10  | 3.6 (2.2)     | 0.65 [-0.25-1.56]   |
|                           |                               |                  | CRQ Fatigue               | 8W   | 10  | 3.4 (1.6)     | 10  | 3.3 (2)       | 0.05 [-0.82-0.93]   |
| Jonsdottir 2015           | Self-management               | UC               | SGRQ Total                | 12M  | 45  | 37.32 (19.11) | 47  | 36.27 (19.42) | -0.05 [-0.46-0.35]  |
| Kruis 2014                | Integrated disease management | UC               | CCQ Total                 | 12M  | 554 | -0.03 (0.7)   | 532 | 0.03 (0.7)    | 0.09 [-0.03- 0.20]  |
|                           |                               |                  | SGRQ Total                | 12M  | 554 | 0.4 (12.7)    | 532 | 0.33 (13)     | -0.01 [-0.12- 0.11] |
|                           |                               |                  | SF36 Physical             | 12M  | 554 | -1.1 (8.6)    | 532 | -0.48 (8.8)   | -0.07 [-0.19- 0.05] |
|                           |                               |                  | SF36 Mental               | 12M  | 554 | 0.73 (9.7)    | 532 | 0.09 (9.8)    | 0.07 [-0.05- 0.18]  |
| Schüz 2015 (Walters 2013) | Health monitoring             | UC               | SGRQ Total                | 6M   | 74  | 39.8 (20.5)   | 83  | 41.7 (17.8)   | 0.10 [-0.21-0.41]   |
|                           |                               |                  |                           | 12M  | 74  | 41.9 (18.9)   | 80  | 40.5 (17.4)   | -0.8 [-0.39-0.24]   |
|                           |                               |                  | SF36 Physical             | 6M   | 74  | 39.9 (10.2)   | 83  | 38.4 (10.1)   | 0.15 [-0.17-0.46]   |
|                           |                               |                  |                           | 12M  | 74  | 38.5 (10.3)   | 80  | 38.5 (9.4)    | 0.0 [-0.31-0.31]    |
|                           |                               |                  | SF36 Mental               | 6M   | 74  | 49.7 (10.6)   | 83  | 48.9 (12)     | 0.07 [-0.24-0.38]   |
|                           |                               |                  |                           | 12M  | 74  | 50.2 (11.4)   | 80  | 50.5 (10.5)   | 0.02 [-0.30-0.33]   |
| Wilson 2015               | PR Maintenance                | UC               | CRQ dyspnea               | Δ12M | 53  | -0.35 (1.17)  | 57  | -0.54 (1.21)  | 0.16 [-0.22-0.53]   |
|                           |                               |                  | CRQ fatigue               | Δ12M | 53  | -0.30 (1.09)  | 58  | -0.41 (1.19)  | 0.10 [-0.28-0.47]   |

|                                                                                      |                                                  |             |                              |      |         |                     |    |              |                     |
|--------------------------------------------------------------------------------------|--------------------------------------------------|-------------|------------------------------|------|---------|---------------------|----|--------------|---------------------|
|                                                                                      |                                                  |             | CRQ emotion                  | Δ12M | 53      | 0.00 (1.46)         | 58 | 0.02 (1.32)  | -0.01 [-0.39-0.36]  |
|                                                                                      |                                                  |             | CRQ mastery                  | Δ12M | 53      | 0.01 (1.42)         | 58 | -0.06 (1.49) | 0.05 [-0.32-0.42]   |
| Steele 2008                                                                          | Exercise adherence after PR                      | UC after PR | SOLDQ Physical functioning   | 20W  | 49      | 45 (18)             | 50 | 41 (15)      | 0.24 [-0.16- 0.64]  |
|                                                                                      |                                                  |             |                              | 12M  | 39      | 44 (18)             | 43 | 40 (16)      | 0.23 [-0.20- 0.67]  |
|                                                                                      |                                                  |             | SOLDQ Emotional functioning  | 20W  | 49      | 67 (20)             | 50 | 66 (19)      | 0.05 [-0.34- 0.44]  |
|                                                                                      |                                                  |             |                              | 12M  | 39      | 65 (21)             | 43 | 65 (18)      | 0.00 [-0.43- 0.43]  |
|                                                                                      |                                                  |             | SOLDQ Coping skills          | 20W  | 49      | 74 (19)             | 50 | 73 (16)      | 0.06 [-0.34- 0.45]  |
|                                                                                      |                                                  |             |                              | 12M  | 39      | 70 (19)             | 43 | 75 (14)      | -0.30 [-0.73- 0.14] |
|                                                                                      |                                                  |             | SOLDQ Treatment satisfaction | 20W  | 49      | 59 (28)             | 50 | 66 (24)      | -0.27 [-0.66- 0.13] |
|                                                                                      |                                                  |             |                              | 12M  | 39      | 63 (24)             | 43 | 66 (26)      | -0.12 [-0.55- 0.32] |
|                                                                                      |                                                  |             | SF36 Physical                | 20W  | 49      | 35 (9)              | 50 | 33 (7)       | 0.25 [-0.15- 0.64]  |
|                                                                                      |                                                  |             |                              | 12M  | 39      | 32 (8)              | 43 | 31 (8)       | 0.12 [-0.31- 0.56]  |
| SF36 Mental                                                                          | 20W                                              | 49          | 46 (11)                      | 50   | 47 (9)  | -0.10 [-0.49- 0.30] |    |              |                     |
|                                                                                      | 12M                                              | 39          | 45 (11)                      | 43   | 48 (10) | -0.28 [-0.72- 0.15] |    |              |                     |
| <b>Studies comparing physical activity interventions added to PR versus PR alone</b> |                                                  |             |                              |      |         |                     |    |              |                     |
| Altenburg 2014                                                                       | PA counselling (12W) + PR (9W)                   | PR (9W)     | CRQ                          | 3M   | 22      | 101 (18)            | 15 | 100 (21)     | 0.05 [-0.61-0.71]   |
|                                                                                      |                                                  |             |                              | 15M  | 10      | 77 (23)             | 13 | 80 (21)      | -0.13 [-0.96-0.69]  |
|                                                                                      |                                                  |             | CCQ                          | 3M   | 22      | 1.75 (0.9)          | 15 | 1.80 (1.0)   | 0.05 [-0.61-0.71]   |
|                                                                                      |                                                  |             |                              | 15M  | 10      | 3.10 (1.0)          | 13 | 2.30 (0.9)   | -0.82 [-1.68-0.05]  |
| Burtin 2015                                                                          | PA counselling (6M) + PR (6M)                    | PR (6M)     | CRQ                          | Δ3M  | 30      | 23 (14)             | 31 | 19 (12)      | 0.30 [-0.02-0.81]   |
|                                                                                      |                                                  |             |                              | Δ6M  | 28      | 19 (21)             | 22 | 17 (14)      | 0.11 [-0.45-0.67]   |
| Cruz 2016                                                                            | PA focused behavioral counselling (6M) + PR (3M) | PR (3M)     | SGRQ                         | 3M   | 13      | 24.0 (13.6)         | 13 | 26.9 (15.2)  | 0.19 [-0.58-0.97]   |
|                                                                                      |                                                  |             |                              | 6M   | 13      | 23.1 (10.3)         | 13 | 26.2 (15.3)  | 0.23 [-0.54-1.00]   |
| de Blok 2006                                                                         | Lifestyle PA counselling (9W) + PR (9W)          | PR (9W)     | SGRQ                         | 9W   | 8       | 56.3 (10.36)        | 8  | 44.7 (22.7)  | -0.67 [-1.69-0.34]  |
|                                                                                      |                                                  |             | RAND36-PF                    | 9W   | 8       | 28.8 (23.4)         | 8  | 34.4 (27.8)  | -0.21 [-1.19-0.78]  |
|                                                                                      |                                                  |             | RAND36-V                     | 9W   | 8       | 54.4 (18.9)         | 8  | 51.3 (18.4)  | 0.16 [-0.82-1.14]   |
|                                                                                      |                                                  |             | RAND36-BP                    | 9W   | 8       | 74.0 (32.5)         | 8  | 72.5 (36.4)  | 0.04 [-0.94-1.02]   |



|                                                                                                        |                                           |                           |                        |      |              |                    |    |              |                     |
|--------------------------------------------------------------------------------------------------------|-------------------------------------------|---------------------------|------------------------|------|--------------|--------------------|----|--------------|---------------------|
|                                                                                                        |                                           |                           | RAND36-GHP             | 9W   | 8            | 25.6 (10.9)        | 8  | 39.3 (16.1)  | -0.96 [-2.01-0.10]  |
|                                                                                                        |                                           |                           | RAND36-HC              | 9W   | 8            | 68.7 (44.9)        | 8  | 65.6 (35.9)  | 0.07 [-0.91-1.05]   |
| Kawagoshi 2015                                                                                         | Pedometer feedback during home-based PR   | Home-based PR             | CRQ                    | 12M  | 12           | 108 (19)           | 15 | 110 (19)     | -0.10 [-0.86-0.66]  |
| <b>Studies comparing physical activity interventions versus another physical activity intervention</b> |                                           |                           |                        |      |              |                    |    |              |                     |
| Berry 2010                                                                                             | Lifestyle activity program                | ET                        | SF36 Physical          | 3M   | 61           | 36 (7)             | 69 | 36.7 (7)     | -0.10 [-0.44-0.25]  |
|                                                                                                        |                                           |                           |                        | 6M   | 61           | 35.7 (7.8)         | 69 | 36.5 (7)     | -0.11 [-0.45-0.24]  |
|                                                                                                        |                                           |                           |                        | 12M  | 61           | 35.2 (9.4)         | 69 | 36.2 (9.1)   | -0.11 [-0.45-0.24]  |
|                                                                                                        |                                           |                           | SF36 Mental            | 3M   | 61           | 51.3 (8.6)         | 69 | 51.9 (8.3)   | -0.07 [-0.42-0.27]  |
|                                                                                                        |                                           |                           |                        | 6M   | 61           | 51.1 (7.8)         | 69 | 52.3 (8.3)   | -0.15 [-0.49-0.20]  |
|                                                                                                        |                                           |                           |                        | 12M  | 61           | 50.3 (9.4)         | 69 | 51.1 (9.1)   | -0.09 [-0.43-0.26]  |
|                                                                                                        |                                           |                           | CRQ                    | 3M   | 61           | 4.6 (0.8)          | 69 | 4.8 (0.8)    | -0.25 [-0.59-0.10]  |
|                                                                                                        |                                           |                           |                        | 6M   | 61           | 4.5 (0.8)          | 69 | 4.7 (0.8)    | -0.25 [-0.59-0.10]  |
|                                                                                                        |                                           |                           |                        | 12M  | 61           | 4.6 (0.8)          | 69 | 4.6 (0.8)    | 0.00 [-0.34-0.34]   |
| Effing 2011                                                                                            | ET and self-management                    | Self-management           | CRQ Dyspnea            | Δ7M  | 68           | 0.37 (1.07)        | 63 | 0.04 (0.95)  | 0.32 [-0.02- 0.67]  |
|                                                                                                        |                                           |                           |                        | Δ12M | 76           | 0.30 (0.88)        | 68 | -0.02 (0.98) | 0.34 [0.01- 0.67]   |
|                                                                                                        |                                           |                           | CRQ Fatigue            | Δ7M  | 68           | 0.15 (1.23)        | 63 | 0.03 (1.34)  | 0.09 [-0.25- 0.44]  |
|                                                                                                        |                                           |                           |                        | Δ12M | 76           | 0.15 (1.3)         | 68 | 0.06 (1.31)  | 0.07 [-0.26- 0.40]  |
|                                                                                                        |                                           |                           | CRQ Emotional function | Δ7M  | 68           | -0.02 (0.9)        | 63 | -0.05 (0.95) | 0.03 [-0.31- 0.38]  |
|                                                                                                        |                                           |                           |                        | Δ12M | 76           | 0.18 (0.95)        | 68 | 0.08 (0.99)  | 0.10 [-0.22- 0.43]  |
|                                                                                                        |                                           |                           | CRQ Mastery            | Δ7M  | 68           | 0.13 (0.98)        | 63 | 0.14 (0.95)  | -0.01 [-0.35- 0.33] |
|                                                                                                        |                                           |                           |                        | Δ12M | 76           | 0.33 (2.87)        | 68 | 0.22 (0.98)  | 0.05 [-0.28- 0.38]  |
|                                                                                                        |                                           |                           | CCQ Total              | Δ7M  | 67           | -0.03 (0.65)       | 60 | -0.01 (0.77) | 0.03 [-0.32- 0.38]  |
| Δ12M                                                                                                   | 70                                        | -0.10 (0.66)              |                        | 66   | -0.08 (0.81) | 0.03 [-0.31- 0.36] |    |              |                     |
| Mendoza 2015                                                                                           | Pedometer-based counselling               | Standard counselling      | SGRQ Total             | Δ3M  | 50           | -8.8 (12.2)        | 47 | -3.8 (10.9)  | 0.43 [0.03-0.83]    |
| Moy 2015                                                                                               | Internet-mediated pedometer-based program | Pedometer recording only  | SGRQ Total             | Δ4M  | 144          | -3.2 (11.1)        | 77 | -0.8 (10.9)  | 0.22 [-0.06-0.49]   |
| Nguyen 2009                                                                                            | Cell phone-mediated exercise              | Cell phone-mediated self- | SGRQ Total             | 3M   | 9            | 39 (14.1)          | 8  | 54.4 (14.1)  | 1.04 [0.00-2.07]    |
|                                                                                                        |                                           |                           |                        | 6M   | 9            | 41.7 (14.1)        | 8  | 45.2 (14.6)  | 0.23 [-0.72-1.19]   |
|                                                                                                        |                                           |                           |                        | 3M   | 9            | 32.9 (6.9)         | 8  | 27.5 (6.8)   | 0.75 [-0.25-1.74]   |

|               |                                                   |                                        |                        |      |    |              |    |             |                     |
|---------------|---------------------------------------------------|----------------------------------------|------------------------|------|----|--------------|----|-------------|---------------------|
|               | persistence program                               | monitoring program                     | SF36 Physical          | 6M   | 9  | 33.8 (6.9)   | 8  | 30.3 (7.1)  | 0.48 [-0.49-1.45]   |
|               |                                                   |                                        | SF36 Mental            | 3M   | 9  | 48.5 (11.4)  | 8  | 48.4 (11.6) | 0.01 [-0.94-0.96]   |
|               |                                                   |                                        |                        | 6M   | 9  | 46.9 (11.4)  | 8  | 55.2 (11.8) | -0.68 [-1.67-0.31]  |
| Nguyen 2013   | Internet-mediated dyspnea self-management program | General EDU                            | CRQ Total              | 3M   | 43 | 102.2 (20.1) | 41 | 99.1 (20.2) | 0.15 [-0.28-0.58]   |
|               |                                                   |                                        |                        | 6M   | 43 | 104.6 (21.9) | 41 | 97.6 (22.1) | 0.32 [-0.12-0.75]   |
|               |                                                   |                                        |                        | 12M  | 43 | 104.8 (23.9) | 41 | 98.4 (24.3) | 0.26 [-0.17-0.69]   |
|               |                                                   |                                        | SF36 Physical          | 3M   | 43 | 36.5 (10.5)  | 41 | 36.1 (10.4) | 0.04 [-0.39-0.47]   |
|               |                                                   |                                        |                        | 6M   | 43 | 37.1 (11.2)  | 41 | 35 (11.3)   | 0.18 [-0.24-0.61]   |
|               |                                                   |                                        |                        | 12M  | 43 | 38.9 (11.2)  | 41 | 35.2 (11.3) | 0.33 [-0.10-0.77]   |
|               |                                                   |                                        | SF36 Mental            | 3M   | 43 | 53.7 (10.2)  | 41 | 51.1 (10.5) | 0.25 [-0.18-0.68]   |
|               |                                                   |                                        |                        | 6M   | 43 | 52.9 (11)    | 41 | 51.2 (11.1) | 0.15 [-0.28-0.58]   |
|               |                                                   |                                        |                        | 12M  | 43 | 52.2 (11.7)  | 41 | 52.1 (11.8) | 0.01 [-0.42-0.44]   |
| Pomidori 2012 | Home-based walking with fixed speed               | Home-based walking with fixed distance | SGRQ Total             | 6M   | 18 | 33 (11)      | 18 | 31 (13)     | -0.16 [-0.82-0.49]  |
|               |                                                   |                                        |                        | Δ12M | 18 | 6 (13)       | 18 | 5 (7)       | -0.09 [-0.75-0.56]  |
| Probst 2011   | High intensity and whole-body ET                  | Light intensity and breathing ET       | SGRQ Total             | 12W  | 20 | 38.4 (20.7)  | 20 | 47.7 (11.7) | 0.52 [-0.11-1.16]   |
| Sewell 2005   | Individualized ET                                 | General ET                             | CRQ Dyspnea            | Δ7W  | 64 | 0.62 (1.4)   | 64 | 0.89 (1.4)  | -0.19 [-0.54- 0.16] |
|               |                                                   |                                        | CRQ Fatigue            | Δ7W  | 64 | 0.53 (1.4)   | 64 | 0.83 (1.3)  | 0.11 [-0.24- 0.46]  |
|               |                                                   |                                        | CRQ Emotional function | Δ7W  | 64 | 0.62 (1.2)   | 64 | 0.60 (1.4)  | 0.02 [-0.33- 0.36]  |
|               |                                                   |                                        | CRQ Mastery            | Δ7W  | 64 | 0.66 (1.6)   | 64 | 0.76 (1.3)  | -0.07 [-0.42- 0.28] |
| Tabak 2014    | Internet-mediated PA counselling                  | ET                                     | CCQ                    | Δ3W  | 14 | -0.3 (0.5)   | 15 | 0 (0.6)     | 0.53 [1.27-0.22]    |

SF-36: Self-Reported 36 questionnaire, SGRQ: St. George Respiratory Questionnaire. CRQ: Chronic Respiratory Questionnaire. SOLDQ: Seattle Obstructive Lung Disease Questionnaire. NS: Non-significant, CRQ-SR: Chronic Respiratory Questionnaire- Self Reported. CCQ: Clinical COPD Questionnaire. ET: Exercise Training, UC: Usual Care, PR: Pulmonary Rehabilitation, M: Month/s, W: Week/s, O<sub>2</sub>: Oxygen, EDU: Education.

Online Table S6: physical activity interventions effect on dyspnea.

| Study Name                                                                                             | Intervention                            | Control                          | Outcome (Unit) | Time Point | Intervention |            | Control |            | Effect Size [95%CI] |
|--------------------------------------------------------------------------------------------------------|-----------------------------------------|----------------------------------|----------------|------------|--------------|------------|---------|------------|---------------------|
|                                                                                                        |                                         |                                  |                |            | n            | Mean (SD)  | n       | Mean (SD)  |                     |
| <b>Studies comparing physical activity interventions versus usual care (or placebo)</b>                |                                         |                                  |                |            |              |            |         |            |                     |
| Faulkner 2010                                                                                          | Supervised ET                           | UC                               | MRC            | 9W         | 6            | 2.0 (0.5)  | 8       | 2.5 (0.7)  | 0.75 [-0.36-1.86]   |
| Hornikx 2015                                                                                           | PA counselling                          | UC                               | MRC            | Δ1M        | 15           | 0 (0.74)   | 15      | 0 (0.74)   | 0.00 [-0.72-0.72]   |
| Kruis 2014                                                                                             | Integrated disease management           | UC                               | MRC            | 12M        | 554          | 0.23 (1.1) | 532     | 0.19 (1.2) | 0.03 [-0.08, 0.15]  |
| Steele 2008                                                                                            | Exercise adherence after PR             | UC after PR                      | Activity SOB   | 20W        | 49           | 4.5 (2.1)  | 50      | 4.9 (2.4)  | 0.18 [-0.22-0.57]   |
|                                                                                                        |                                         |                                  |                | 12M        | 39           | 4.8 (2.2)  | 43      | 4.9 (2.5)  | 0.04 [-0.39-0.48]   |
|                                                                                                        |                                         |                                  | SOB            | 20W        | 49           | 3.8 (2.2)  | 50      | 4.3 (2.6)  | 0.21 [-0.19-0.60]   |
|                                                                                                        |                                         |                                  |                | 12M        | 39           | 4.0 (2.3)  | 43      | 4.4 (2.6)  | 0.16 [-0.27--0.60]  |
| <b>Studies comparing physical activity interventions added to PR versus PR alone</b>                   |                                         |                                  |                |            |              |            |         |            |                     |
| Kawagoshi 2015                                                                                         | Pedometer feedback during home-based PR | Home-based PR                    | MRC            | 12M        | 12           | 0.9 (1.2)  | 15      | 1.4 (0.9)  | 0.46 [-0.31-1.24]   |
| <b>Studies comparing physical activity interventions versus another physical activity intervention</b> |                                         |                                  |                |            |              |            |         |            |                     |
| Mendoza 2015                                                                                           | Pedometer-based counselling             | Standard counselling             | mMRC           | Δ3M        | 50           | 0.2 (0.7)  | 47      | 0 (0.9)    | -0.25 [-0.65-0.15]  |
| Probst 2011                                                                                            | High intensity and whole-body ET        | Light intensity and breathing ET | MRC            | 12W        | 20           | 3 (1.5)    | 20      | 4 (1.5)    | 0.65 [-0.02-1.29]   |
| Tabak 2014                                                                                             | Internet-mediated PA counselling        | ET                               | MRC            | Δ3W        | 14           | -0.3 (0.7) | 15      | -0.2 (0.9) | 0.12 [-0.61-0.85]   |

ET: Exercise Training, PA: Physical Activity, MRC: Medical Research Council dyspnea scale, mMRC: Modified Medical Research Council dyspnea scale, SOB: Shortness of Breath. M: Month/s, W: Week/s, Δ: Change from Baseline.

Online Table S7: physical activity interventions effect on lung function.

| Study Name                                                                                             | Intervention                                | Control     | Outcome (Unit)               | Time Point  | Intervention |             | Control |             | Effect Size [95%CI]  |
|--------------------------------------------------------------------------------------------------------|---------------------------------------------|-------------|------------------------------|-------------|--------------|-------------|---------|-------------|----------------------|
|                                                                                                        |                                             |             |                              |             | n            | Mean (SD)   | n       | Mean (SD)   |                      |
| <b>Studies comparing physical activity interventions versus usual care (or placebo)</b>                |                                             |             |                              |             |              |             |         |             |                      |
| Borges 2014                                                                                            | Whole-body training exercise (≥ 3 sessions) | UC          | FEV <sub>1</sub> % predicted | Δ discharge | 15           | 44.6 (14.1) | 14      | 42.3 (14.4) | 0.16 [-0.57-0.89]    |
| Dal Negro 2010 and 2012                                                                                | EAAs                                        | Placebo     | FEV <sub>1</sub> (l/sec)     | 1M          | 44           | 0.79 (0.42) | 44      | 0.74 (0.21) | 0.15 [-0.27-0.57]    |
|                                                                                                        |                                             |             |                              | 3M          | 44           | 0.75 (0.36) | 44      | 0.71 (0.20) | 0.14 [-0.28-0.55]    |
| Faulkner 2010                                                                                          | Supervised ET                               | UC          | FEV <sub>1</sub> % predicted | 9W          | 6            | 65.3 (11.9) | 8       | 66.5 (12.1) | -0.09 [-1.15- 0.97]  |
| Steele 2008                                                                                            | Exercise adherence after PR                 | UC after PR | FEV <sub>1</sub> % predicted | 20W         | 49           | 44 (18)     | 50      | 37 (17)     | 0.40 [0.00- 0.79]    |
| <b>Studies comparing physical activity interventions added to PR versus PR alone</b>                   |                                             |             |                              |             |              |             |         |             |                      |
| Duiverman 2008                                                                                         | NIPPV during PR                             | PR          | FEV <sub>1</sub> (l/sec)     | 12M         | 39           | 40 (19)     | 43      | 37 (17)     | 0.17 [-0.27- 0.60]   |
| <b>Studies comparing physical activity interventions versus another physical activity intervention</b> |                                             |             |                              |             |              |             |         |             |                      |
| Berry 2003                                                                                             | Maintenance ET                              | UC          | FEV <sub>1</sub> (l/sec)     | 15M         | 62           | 1.56 (0.24) | 56      | 1.56 (0.22) | 0.00 [-0.36- 0.36]   |
|                                                                                                        |                                             |             | FER                          | 15M         | 62           | 53.4 (4.82) | 56      | 55.3 (5.34) | -0.37 [-0.74- -0.01] |

NIPPV: Non-Invasive Positive Pressure Ventilation, PR: Pulmonary Rehabilitation, UC: Usual Care, FEV<sub>1</sub>: Forced Expired Volume in One Second, M: Month/S, W: Week/S, FER: Forced Expiratory Ratio, Δ: Change from Baseline.
